# Supplementary material
Source: PubMed Central journal article supplement (PMC3028633)

## **Supplementary Table and Figure legends.**

### **Table S1. Cell viability of *TRA1* deletion mutants.**

Plasmids containing either wild-type 3xFlag-*TRA1* (pSHY690; ARS CEN *TRP1*) or the indicated *Tra1* deletion derivatives of PSH690 were transformed into the *TRA1* shuffle strain (SHY785) and patched on 5-FOA containing plates to select for cells having lost the *TRA1*-containing *URA3* marked plasmid. Growth was assessed relative to wild-type where wild-type growth is denoted by (+++), while no growth is denoted by (-). Transformants were classified as dominant or recessive using growth tests shown in Fig S2 and data not shown.

### **Table S2. Cell growth phenotypes of viable *TRA1* mutants.**

Viable *TRA1* mutants from Table S1 were compared with a wild type *TRA1* containing strain for growth on three types of synthetic media: 1) glucose complete media (GC) lacking tryptophan incubated at the indicated temperatures, 2) GC media containing 3 µg/ml SMM and lacking tryptophan, isoleucine, and valine, or 3) synthetic media containing 2% galactose and lacking tryptophan. Growth was assessed relative to wild-type where wild-type growth is denoted by (+++), while no growth is denoted by (-).

### **Table S3. Viability of *TRA1* PI3K domain site-specific mutants.**

Plasmids encoding either wild-type *TRA1* (pSH690) or the indicated *Tra1* single residue mutations were transformed into the *TRA1* shuffle strain (SHY785) and streaked onto 5-FOA containing plates to select for cells lacking the *TRA1*-encoding *URA3* marked plasmid. Growth was assessed related to wild-type where wild-type growth is denoted by (+++), while no growth is denoted by (-).

### **Table S4. RT-qPCR and CHIP primer sequences used in this study.**

### **Figure S1. Domain and repeat sequence alignment of *Tra1* and TRRAP.**

An HMM alignment of *Tra1* and TRRAP. The predicted secondary and tertiary

structures are shown above and below the sequence of Tra1 and TRRAP. Individual domain and repeat units are depicted as colored boxes using the same color scheme presented in Figure 1B. HEAT and TPR repeats are colored as orange and green boxes. Secondary structure for Tra1 and TRRAP were predicted by PSIPRED. H, helix, E, beta sheet, C, coil, -, gap. The amino acid position of Tra1 and TRRAP are indicated at the left side of the amino acid sequence.

**Figure S2. Dominance growth test of *TRA1* deletion mutants.** Plasmids containing either wild-type 3xFlag-*TRA1* (pSHY690; ARS CEN *TRP1*) or the indicated *TRA1* deletion derivatives of PSH690 were transformed into the *TRA1* shuffle strain (SHY785). Five fold serial dilution of each yeast strain were spotted on either glucose complete (GC) plates lacking uracil and tryptophan, or GC media containing 3 µg/ml SMM and lacking uracil and tryptophan. Growth was assessed relative to wild-type.

**Supplementary Table 1. Cell viability of *TRA1* deletion mutants**

| Deletion | Residues  | Domain <sup>1</sup> | Growth Phenotype (FOA) <sup>2</sup> | Dominance <sup>3</sup> |
|----------|-----------|---------------------|-------------------------------------|------------------------|
| Δ1       | 5-87      | H1-2                | ++++                                | R                      |
| Δ2       | 88-165    | H3-4                | +++                                 | R                      |
| Δ3       | 166-235   | H4                  | ++++                                | R                      |
| Δ4       | 236-318   | H5                  | ++++                                | R                      |
| Δ5       | 319-399   | H6-7                | ++                                  | R                      |
| Δ6       | 400-500   | H8-9                | -                                   | R                      |
| Δ7       | 501-559   | DOR                 | ++++                                | R                      |
| Δ8       | 560-653   | H10                 | -                                   | R                      |
| Δ9       | 654-731   | H11                 | -                                   | R                      |
| Δ10      | 732-820   | H12-13              | -                                   | R                      |
| Δ11      | 821-908   | H14-15              | -                                   | R                      |
| Δ12      | 909-987   | H16                 | -                                   | R                      |
| Δ13      | 988-1126  | H17-19              | -                                   | R                      |
| Δ14      | 1127-1223 | H20-21              | -                                   | R                      |
| Δ15      | 1224-1319 | H22-23              | -                                   | R                      |
| Δ16      | 1320-1423 | H24-25              | -                                   | R                      |
| Δ17      | 1424-1508 | H26-27              | ++                                  | R                      |
| Δ18      | 1509-1590 | H28-29              | ++                                  | R                      |
| Δ19      | 1591-1685 | H29-30              | -                                   | R                      |
| Δ20      | 1686-1823 | H31-33              | -                                   | R                      |
| Δ21      | 1824-1955 | H34-36              | ++++                                | R                      |
| Δ22      | 1956-2050 | H37-38              | ++++                                | R                      |
| Δ23      | 2051-2151 | H39-41              | ++++                                | R                      |
| Δ24      | 2152-2230 | H41-42              | ++                                  | R                      |
| Δ25      | 2231-2325 | H43-45              | +                                   | R                      |
| Δ26      | 2326-2436 | H46-48              | -                                   | R                      |
| Δ27      | 2437-2552 | H49-50              | -                                   | R                      |
| Δ28      | 2553-2614 | H51-T1              | -                                   | R                      |
| Δ29      | 2615-2700 | T2-4                | -                                   | R                      |
| Δ30      | 2701-2823 | T5-7                | -                                   | R                      |

<sup>1</sup> H, HEAT; T, TPR; PI3KN, N-lobe; PI3KC, C-lobe

<sup>2</sup>Growth compared to wildtype +++++

<sup>3</sup>Transformants were classified as dominant (D) or recessive (R)

**Supplementary Table 1 continued**

| Deletion | Residues  | Domain <sup>1</sup> | Growth Phenotype (FOA) <sup>2</sup> | Dominance <sup>3</sup> |
|----------|-----------|---------------------|-------------------------------------|------------------------|
| Δ31      | 2824-2913 | T7-10               | -                                   | R                      |
| Δ32      | 2914-3007 | T10-12              | +                                   | R                      |
| Δ33      | 3008-3093 | T13-14              | -                                   | R                      |
| Δ34      | 3094-3176 | T15-16              | -                                   | R                      |
| Δ35      | 3177-3239 | FRB                 | -                                   | R                      |
| Δ36      | 3240-3345 | FRB                 | -                                   | R                      |
| Δ37      | 3346-3397 | PI3KN               | -                                   | R                      |
| Δ38      | 3398-3536 | PI3KN-C             | -                                   | R                      |
| Δ39      | 3537-3676 | PI3KC               | -                                   | R                      |
| Δ40      | 3677-3710 | PI3KC               | -                                   | R                      |
|          |           | PI3KC-              |                                     |                        |
| Δ41      | 3711-3724 | FATC                | ++                                  | R                      |
| Δ42      | 3725-3744 | FATC                | -                                   | R                      |
| Δ43      | 3486-3517 | PI3KN-C             | -                                   | R                      |
| Δ44      | 3585-3600 | PI3KC               | -                                   | R                      |

<sup>1</sup> H, HEAT; T, TPR; PI3KN, N-lobe; PI3KC, C-lobe

<sup>2</sup>Growth compared to wildtype +++++

<sup>3</sup>Transformants were classified as dominant (D) or recessive (R)

**Supplementary Table 2. Cell growth phenotypes of viable *TRA1* mutants**

| Deletion | Growth Phenotype <sup>1</sup> |        |        |       |       |
|----------|-------------------------------|--------|--------|-------|-------|
|          | (24°C)                        | (30°C) | (37°C) | (SMM) | (GAL) |
| Δ1       | ++++                          | ++++   | +++    | +++   | +++   |
| Δ2       | +++                           | +++    | +++    | +     | +++   |
| Δ3       | ++++                          | ++++   | +++    | ++    | ++++  |
| Δ4       | ++++                          | ++++   | +++    | +     | ++++  |
| Δ5       | ++                            | ++     | -      | -     | ++    |
| Δ7       | ++++                          | ++++   | ++++   | ++++  | ++++  |
| Δ17      | ++                            | ++     | +      | +     | ++    |
| Δ18      | +++                           | +++    | ++     | +++   | +++   |
| Δ21      | ++++                          | ++++   | +++    | +++   | ++++  |
| Δ22      | ++++                          | ++++   | +++    | +++   | ++++  |
| Δ23      | ++++                          | ++++   | +++    | +++   | +++   |
| Δ24      | ++                            | ++     | -      | -     | +     |
| Δ25      | +                             | +      | -      | N.D.  | N.D.  |
| Δ32      | ++                            | +      | -      | -     | +     |
| Δ41      | +++                           | ++     | +      | ++    | ++    |
| Y3407E   | ++++                          | ++++   | ++++   | ++++  | ++++  |
| R3414E   | ++++                          | ++++   | ++++   | ++++  | ++++  |
| R3424E   | ++++                          | ++++   | ++++   | ++++  | ++++  |
| V3462E   | ++++                          | ++++   | ++++   | ++++  | ++++  |
| K3477E   | ++++                          | ++++   | ++++   | ++++  | ++++  |
| F3480E   | ++++                          | ++++   | ++++   | ++++  | ++++  |
| K3528E   | +++                           | +++    | +++    | +++   | +++   |
| W3542E   | +++                           | +++    | +++    | +++   | +++   |
| M3563E   | ++++                          | ++++   | ++++   | ++++  | ++++  |
| H3570E   | ++++                          | ++++   | ++++   | ++++  | ++++  |
| E3618R   | ++++                          | ++++   | +++    | ++++  | ++++  |
| I3640E   | ++++                          | ++++   | ++++   | ++++  | ++++  |
| E3658R   | ++++                          | ++++   | ++++   | ++++  | ++++  |
| W3674E   | ++++                          | ++++   | ++++   | ++++  | ++++  |

<sup>1</sup>Growth compared to wildtype +++++

**Supplementary Table 3. Cell viability of site-specific *TRA1* mutants**

| Residues | Domain <sup>1</sup> | Growth Phenotype (FOA) <sup>2</sup> |
|----------|---------------------|-------------------------------------|
| Y3407E   | PI3KN               | ++++                                |
| R3414E   | PI3KN               | ++++                                |
| R3424E   | PI3KN               | ++++                                |
| K3432E   | PI3KN               | -                                   |
| V3462E   | PI3KC               | ++++                                |
| K3477E   | PI3KC               | ++++                                |
| F3480E   | PI3KC               | ++++                                |
| K3528E   | PI3KC               | +++                                 |
| W3542E   | PI3KC               | +++                                 |
| M3563E   | PI3KC               | ++++                                |
| H3570E   | PI3KC               | ++++                                |
| E3618R   | PI3KC               | ++++                                |
| I3640E   | PI3KC               | ++++                                |
| R3650E   | PI3KC               | -                                   |
| E3658R   | PI3KC               | ++++                                |
| W3674E   | PI3KC               | ++++                                |

<sup>1</sup> PI3KN, N-lobe; PI3KC, C-lobe

<sup>2</sup>Growth compared to wildtype +++++

**Supplementary Table 4. RT-qPCR and ChIP primer sequences used in this study**

| Name         | Method  | Sequence (5' to 3')            |
|--------------|---------|--------------------------------|
| ACT1-FP      | RT-qPCR | TCAAAATGGCGTGAGGTAGAGA         |
| ACT1-RP      | RT-qPCR | GATGCATTATGGATCGTTGAACTC       |
| GAL1-FP      | RT-qPCR | ACTTGCACCGGAAAGGTTTG           |
| GAL1-RP      | RT-qPCR | GGTACATCACCTCACAGAAGACTT       |
| GAL7-FP      | RT-qPCR | GGACCTCGCCTCGATTTTA            |
| GAL7-RP      | RT-qPCR | AATTCATCACCAGTCGCATTC          |
| GAL3-FP      | RT-qPCR | TTTATGGATGCTTACTACGCCAGAT      |
| GAL3-RP      | RT-qPCR | AACGTTCAATACCAGTTCCGATATC      |
| HIS4-FP      | RT-qPCR | GCACTGCCATTTTACCAAGTACTG       |
| HIS4-RP      | RT-qPCR | CTTGGTGGAGATGCAAACACA          |
| ARG1-FP      | RT-qPCR | CCAAGCCTTTGGATGTTTTCTT         |
| ARG1-RP      | RT-qPCR | ACGATCTTCTACAATATCGATTCTACCA   |
| ARG4-FP      | RT-qPCR | CCACTATTTCGATTGCTTAACAACCTG    |
| ARG4-RP      | RT-qPCR | CAGCTTCCATCTTTTCCTTATTTACA     |
| RPL2B-FP     | RT-qPCR | CGTGCTTTCCACAAGTACAGATTG       |
| RPL2B-RP     | RT-qPCR | CCACCGTGAGGGTGATCAA            |
| RPS11B-FP    | RT-qPCR | ACAACAGATACGAAAAGAGACACAAGA    |
| RPS11B-RP    | RT-qPCR | CACCAACTTGGACACGGAAA           |
| RPS5-FP      | RT-qPCR | TCAAGCACACTTTGGACATCATC        |
| RPS5-RP      | RT-qPCR | TTGGACCAGTGTTGGTGATAGC         |
| GAL1-UAS-FP  | ChIP    | AGTAATACGCTTAACTGCTCATTGCT     |
| GAL1-UAS-RP  | ChIP    | ACGCACGGAGGAGAGTCTTC           |
| GAL1-ATG-FP  | ChIP    | TAACGTCAAGGAGAAAAAACTATAATGACT |
| GAL1-ATG-RP  | ChIP    | CCTTTGCGCTAGAATTGAACTCA        |
| HIS4-UAS-FP  | ChIP    | TTGCGATACGATGGGTCATA           |
| HIS4-UAS-RP  | ChIP    | GAGTCACTGTGCATGGGTTTA          |
| HIS4-ATG-FP  | ChIP    | CAACTGCGCTGTGTAATAGTAATACAAT   |
| HIS4-ATG-RP  | ChIP    | GCCAGATCATCAATTAACGGTAGA       |
| RPL2B-UAS-FP | ChIP    | ACAAACCCAGACAGTACACTATAACA     |
| RPL2B-UAS-RP | ChIP    | GCGGGTTGGCGATTTTGAATAA         |
| RPL2B-ATG-FP | ChIP    | GTCATAAACTCACCAAGAAACCACA      |
| RPL2B-ATG-RP | ChIP    | GAGGAATCCTTCATAACATTTGCCA      |
| POL1-ORF-FP  | ChIP    | TTTCTGCTGAGGTGTCTTATAGAATTCA   |
| POL1-ORF-RP  | ChIP    | GCTTTGGGCCCATGCAT              |



















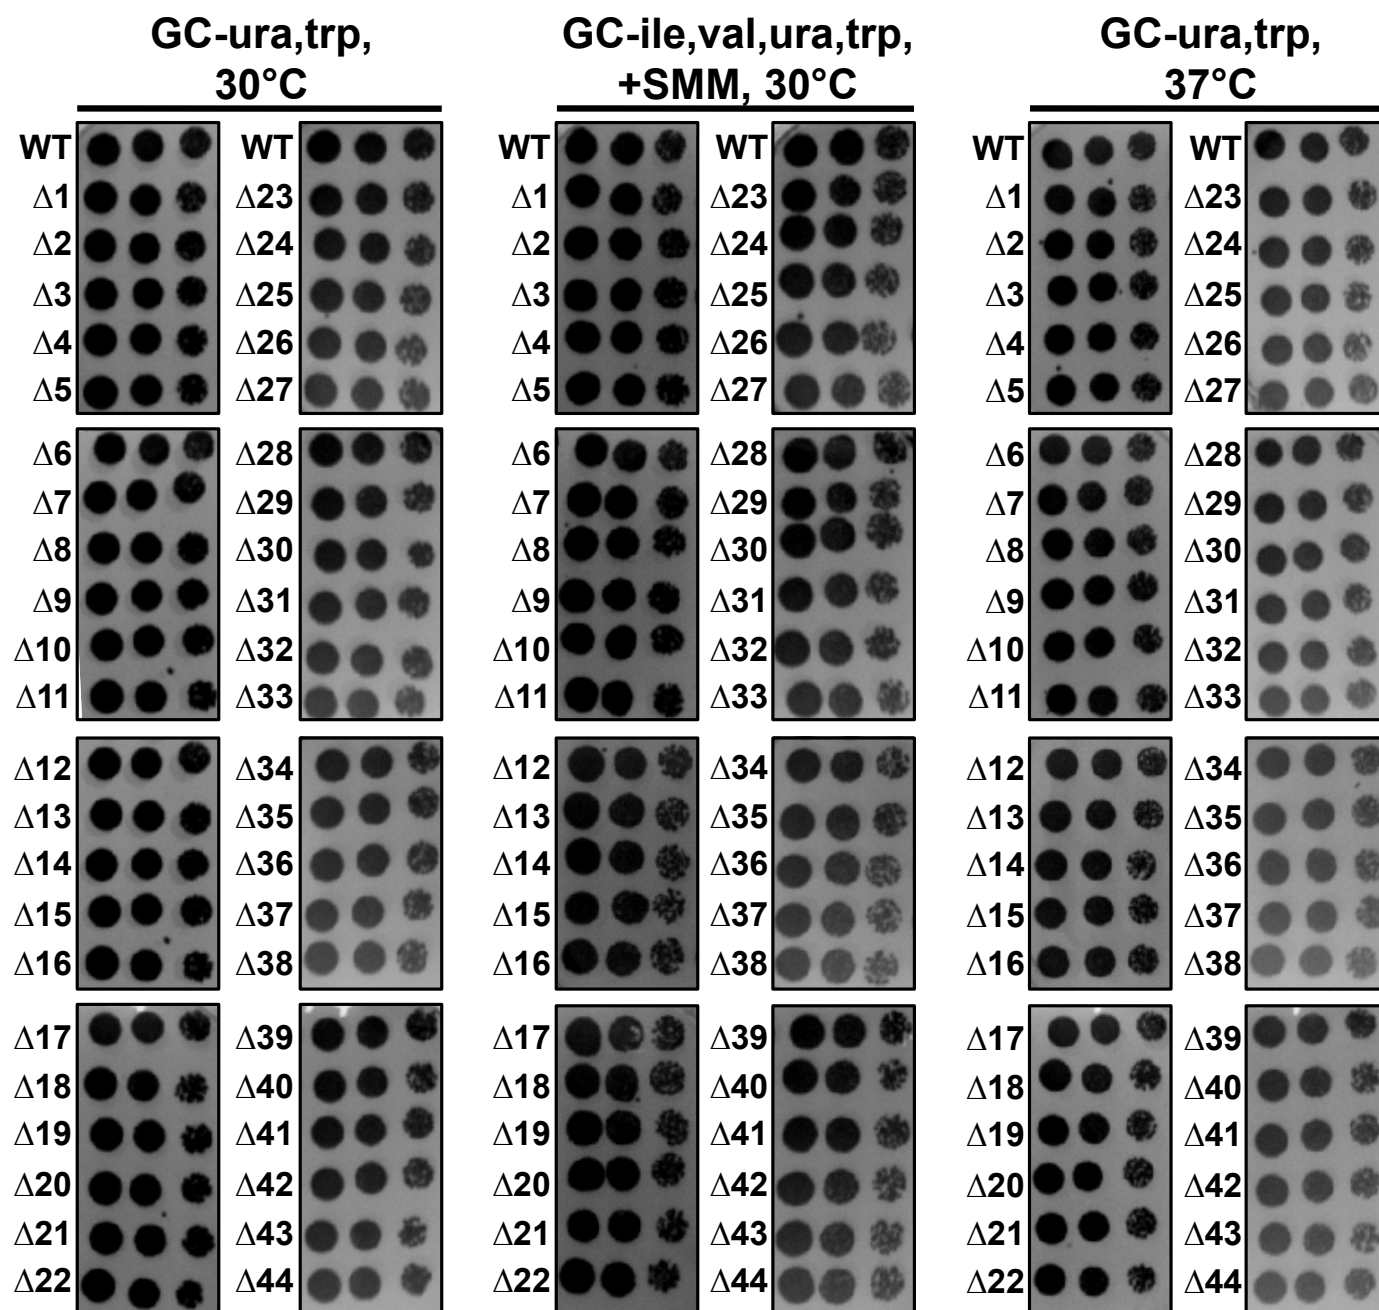

Supplement: supp_31_4_818__1.pdf [file supp_31_4_818__1.pdf]
